# Supplementary material for: A highly efficient aggregation-induced emission fluorescent sensor for copper(ii) in aqueous media
Source: Royal Society of Chemistry journal article supplement (doi:10.1039/c6ay01300g), 2016-01-01
Supplement: c6ay01300g1.pdf [file c6ay01300g1.pdf]

## Supporting Information

### Highly efficient Aggregation-induced emission fluorescent sensor for Copper (II) in aqueous media

Dongmi Li, Juanjuan Li, Ying Duan, Bangtun Zhao and Baoming Ji\*

College of Chemistry and Chemical Engineering, and Henan Key Laboratory of Function-Oriented Porous Materials, Luoyang Normal University, Luoyang 471934, China. E-mail: lyhxxjbm@126.com

#### Materials and Methods

**Materials.** All reagents and solvents were chemical pure (CP) grade or analytical reagent (AR) grade and were used as received.

#### Measurements

<sup>1</sup>H and <sup>13</sup>C NMR were measured on 400 MHz Bruker Advanced III. Mass spectrum was measured on Waters instrument. IR was measured on Bruker VERTEX70. Fluorescent spectra were collected on Hitachi F-4500 spectrophotometer. UV-Vis scanning were measured on Hitachi U-3010 spectrophotometer. Dynamic light scattering (DLC) was measured on a particle size analyzer. Fluorescence lifetimes were measured on Edinburgh Instruments FLS 980. Fluorescence quantum yield were measured on Hamamatsu Quantaurus-QY C11347-11.

#### Synthesis of 3

To the flask were added (*E*)- $\alpha$ -(*p*-aminophenyl)- $\beta$ -(*p*-hydroxyphenyl) acrylonitrile (2.36 g, 10 mmol), salicylic aldehyde (1.22 g, 10 mmol), dry ethanol (30 ml) and acetic acid (0.12 g, 2 mmol) in order. The mixture was refluxed for about 2 h. After cooling to room temperature, the formed yellow precipitate was filtered. Then, the crude product was recrystallized in methanol to get **3** as yellow powder (3.10 g, 91 %). Mp 216.4–218.6 °C; IR (KBr)  $\nu$  3346, 3278, 2212, 1615, 1593, 1510, 1282, 1172, 837, 761 cm<sup>-1</sup>; <sup>1</sup>H NMR (400 MHz, DMSO)  $\delta$  12.99 (s, 1H), 10.30 (s, 1H), 9.03 (s, 1H), 7.96 (s, 1H), 7.88 (d, *J* = 6.4 Hz, 2H), 7.80 (d, *J* = 6.0 Hz, 2H), 7.68 (d, *J* = 6.0 Hz, 1H), 7.55 (d, *J* = 6.8 Hz, 2H), 7.43 (s, 1H), 6.98 (d, *J* = 7.6 Hz, 2H), 6.92 (d, *J* = 6.8 Hz, 2H) ppm; <sup>13</sup>CNMR (100 MHz, DMSO)  $\delta$ : 163.6, 160.3, 160.1, 148.0, 142.5, 133.5, 132.9, 132.6, 131.5, 126.4, 124.8, 122.2, 119.3, 119.2, 118.5, 116.6, 115.9, 105.2, 105.1 ppm; MS *m/z* calcd for C<sub>22</sub>H<sub>16</sub>N<sub>2</sub>O<sub>2</sub> 340.1 [M], found 340.15 [M].

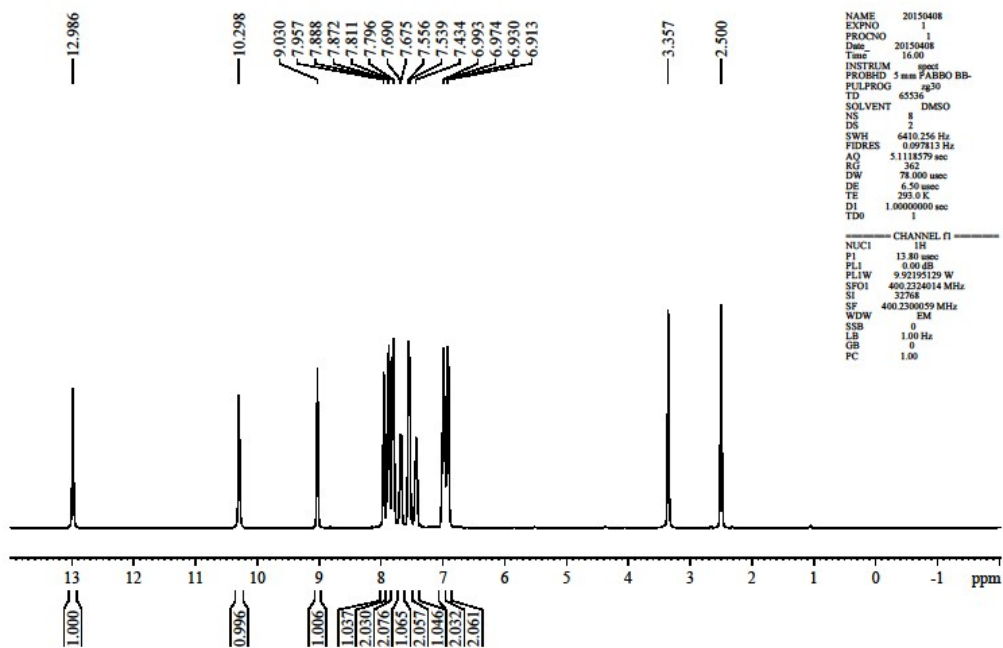

Fig. S1. <sup>1</sup>H NMR spectrum of **3** in DMSO.

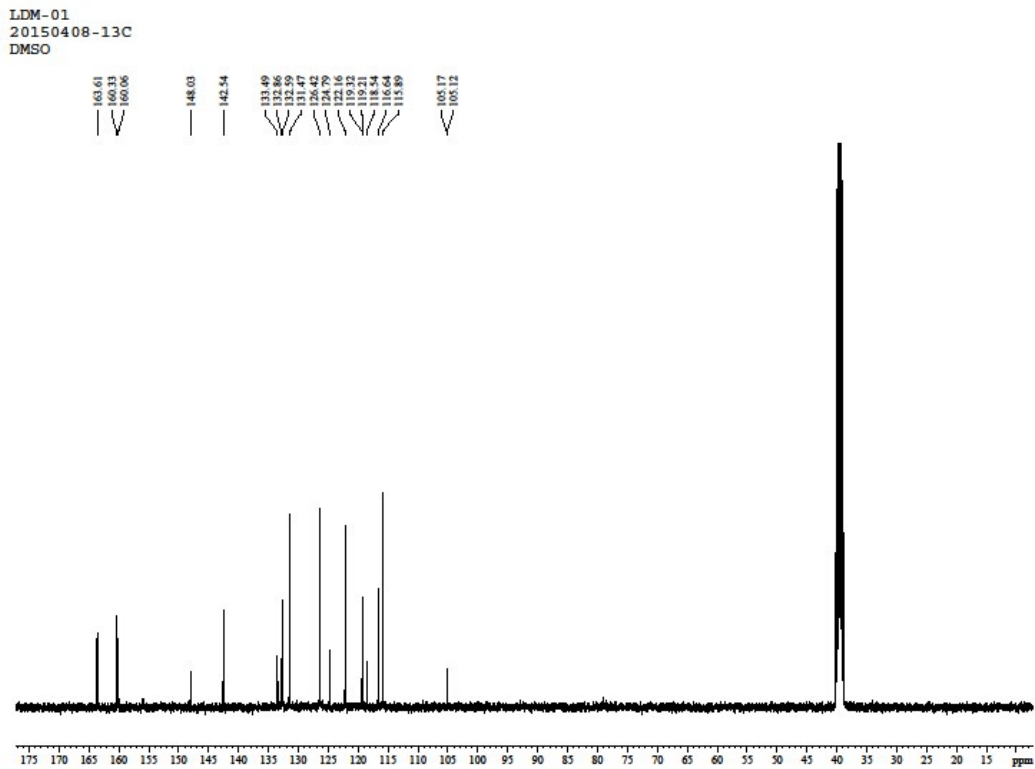

Fig. S2. <sup>13</sup>C NMR spectrum of **3** in DMSO.

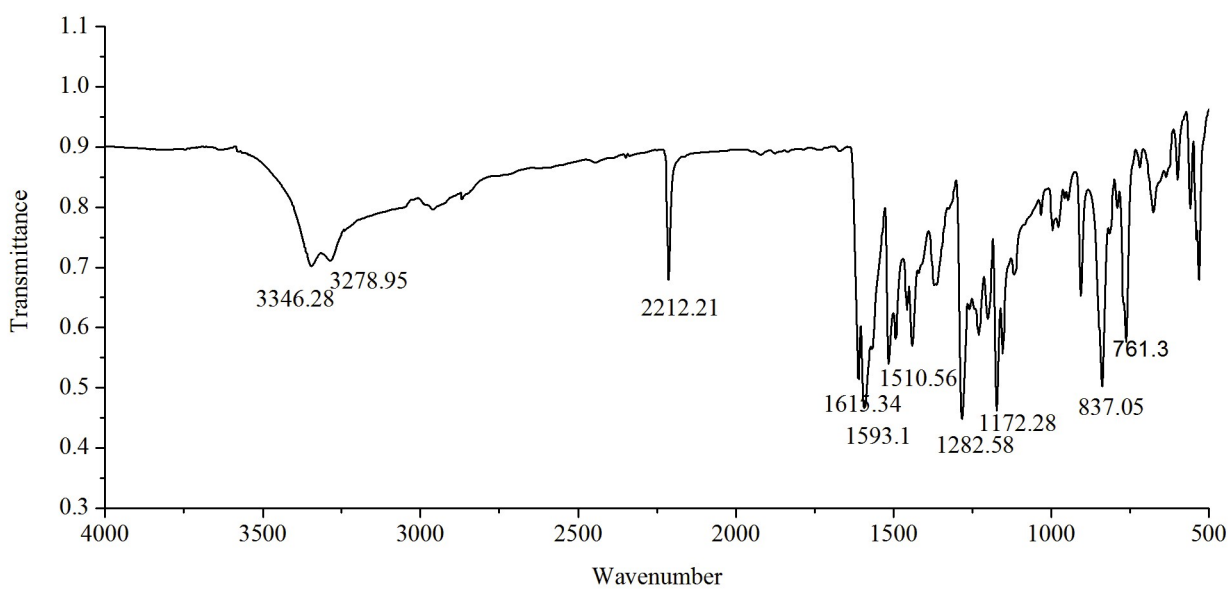

**Fig. S3.** IR spectrum of **3**.

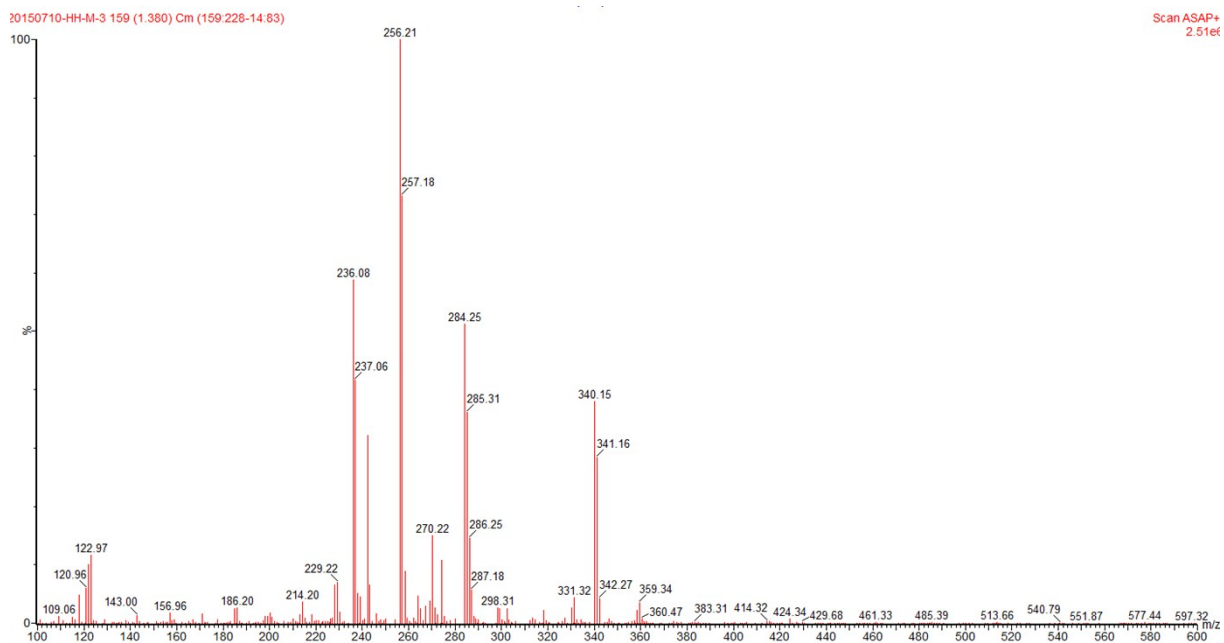

**Fig. S4.** MS spectrum of **3**.

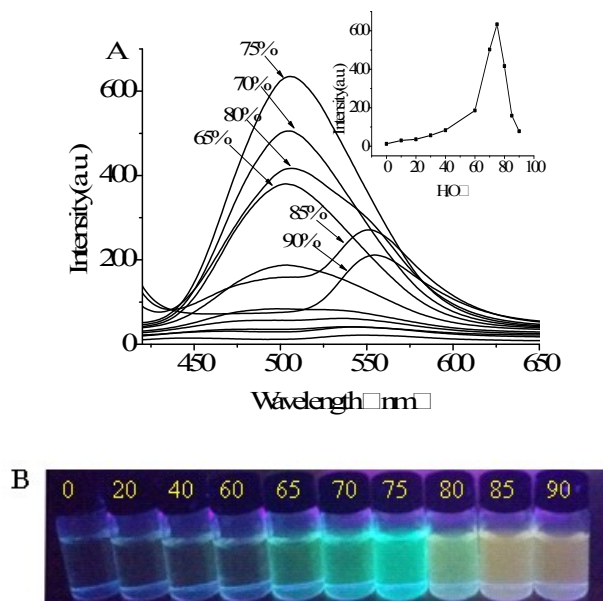

**Fig. S5.** (A) Fluorescence spectra of **3** ( $5.0 \times 10^{-5}$  M) with a change of the water fraction in THF. Inset: fluorescence intensity of **3** at 508 nm vs. water fraction; (B) Images of compound **3** ( $5.0 \times 10^{-5}$  M) with a change of the water fraction in THF under UV light.

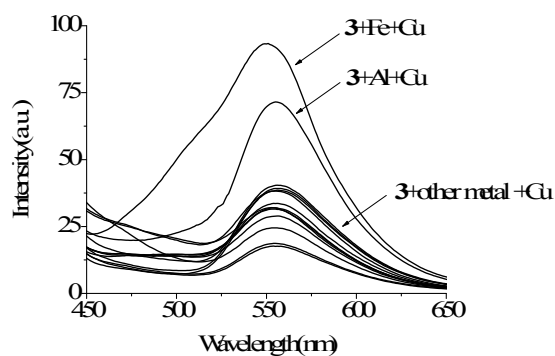

**Fig. S6.** Fluorescence spectrum of **3** in the mixture of  $\text{Cu}^{2+}$  and other metal ions, solvent:  $\text{H}_2\text{O} : \text{THF} = 9 : 1$ ,  $[\mathbf{3}] = [\text{metal}] = 2 \times 10^{-5}$  M.

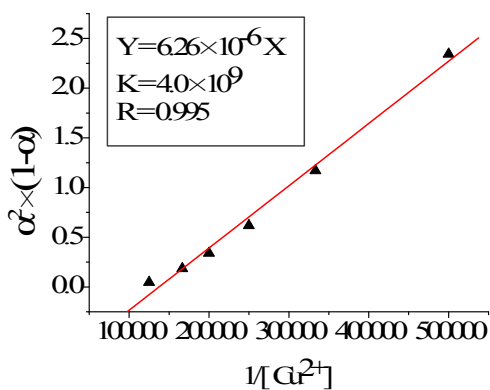

**Fig. S7.** The plot of  $a^2/(1-a)$  vs.  $1/[\text{Cu}^{2+}]$  at 555 nm, solvent:  $\text{H}_2\text{O} : \text{THF} = 9 : 1$ ,  $[\mathbf{3}] = 2 \times 10^{-5}$  M;  $[\text{Cu}^{2+}] = 0-4 \times 10^{-5}$  M.

**Calculation of binding constant:** The binding constant of 2 : 1 complexes were evaluated by the equation:<sup>1-2</sup>

$a^2/(1 - a) = 1/(2K_a C_F [M])$ , where  $a$  is defined as  $[F - F_0]/[F_1 - F_0]$ ,  $C_F$  is the total concentration of probe **3**,  $F$  is fluorescence intensity of probe **3** in the presence of  $\text{Cu}^{2+}$ ,  $F_1$  is fluorescence intensity of probe **3** in the absence of metal;  $F_0$  is fluorescence intensity of probe **3** completely complexed with the metal ion. The plot  $a^2/(1 - a)$  vs.  $1/[\text{Cu}^{2+}]$  was a straight line, and the binding constant of **3**- $\text{Cu}^{2+}$  was found to be  $4 \times 10^9 \text{ M}^{-2}$ .

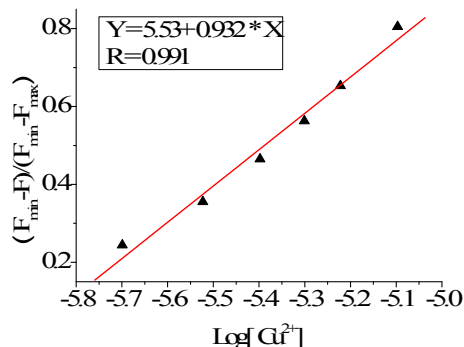

**Fig. S8.** The detection limit of probe **3** for copper  $\text{Cu}^{2+}$

**Calculation of detection limit:** The detection limit was calculated based on a reported method.<sup>3</sup> According to the fluorescence titration experiment, the fluorescent intensity of **3** decreases with the increase of the content of copper ion in the range of 0-10  $\mu\text{M}$ . A linear was then fitted between  $\text{Log}[\text{Cu}^{2+}]$  and  $(F_{\text{min}} - F)/(F_{\text{min}} - F_{\text{max}})$ , and the point at which this line crossed the axis was considered as the detection limit ( $1.5 \times 10^{-6} \text{ M}$ ).

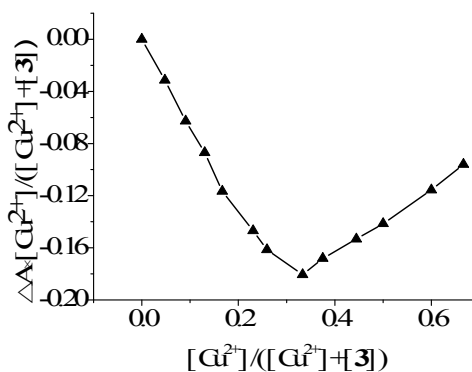

**Fig. S9.** The Job plot of compound **3** ( $2 \times 10^{-5} \text{ M}$ ) with  $\text{Cu}^{2+}$  at 370 nm, solvent:  $\text{H}_2\text{O} : \text{THF} = 2:1$ ;  $[\mathbf{3}] = 2.5 \times 10^{-5} \text{ M}$ ;  $[\text{Cu}^{2+}] = 0-5 \times 10^{-5} \text{ M}$ .

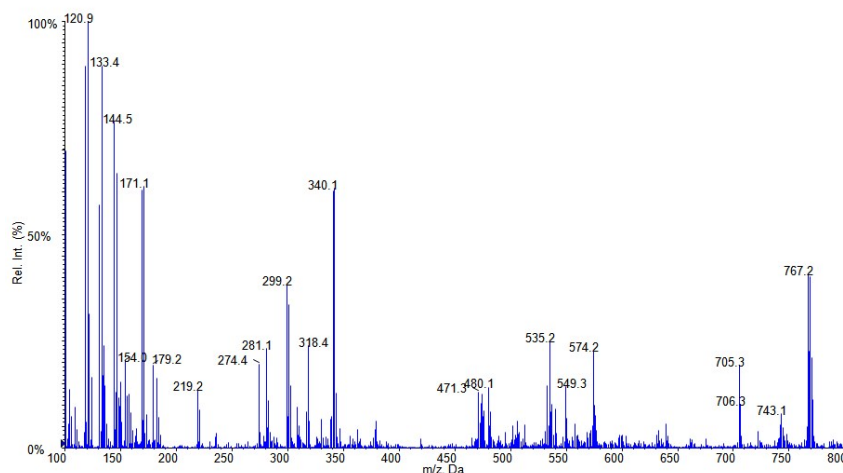

**Fig. S10.** MS spectrum of compound **3** in the presence of  $\text{Cu}^{2+}$ , the peak at  $m/z$  767.2 correspond to  $[2 \cdot \mathbf{3} + \text{Cu}^{2+} + \text{Na}^+]$ .

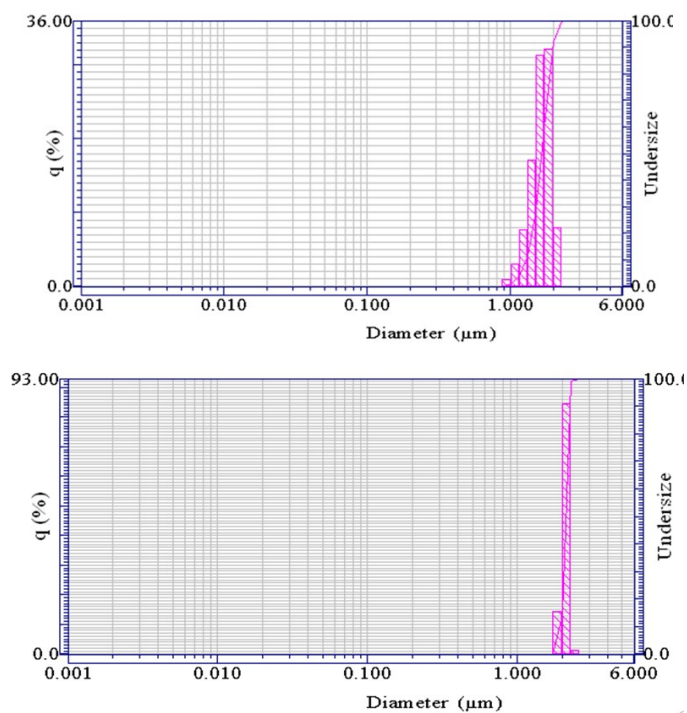

**Fig. S11.** (A) Dynamic light scattering (DLS) diagram of compound **3**, (B) DLS diagram of compound **3** and  $\text{Cu}^{2+}$ . solvent:  $\text{H}_2\text{O}$  : THF = 9:1;  $[\mathbf{3}] = 2 \times 10^{-5} \text{ M}$ ;  $[\text{Cu}^{2+}] = 1 \times 10^{-5} \text{ M}$ .

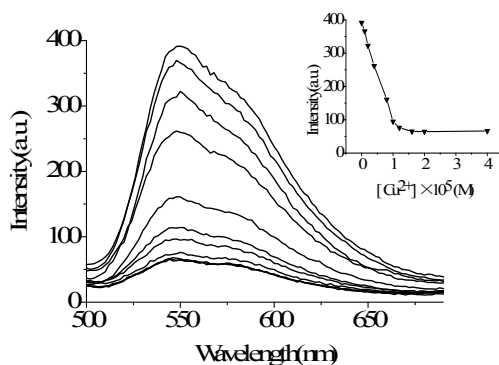

**Fig. S12.** Fluorescence spectra of compound **3** with different amounts of  $\text{Cu}^{2+}$ . Solvent: lake water: THF = 9 : 1;  $[\mathbf{3}] = 2 \times 10^{-5} \text{ M}$ ;  $[\text{Cu}^{2+}] = 0-4 \times 10^{-5} \text{ M}$ ; Inset: the fluorescence change of compound **3** with  $\text{Cu}^{2+}$  at 550 nm; (B) The Job plot of compound **3** ( $2 \times 10^{-5} \text{ M}$ ) with  $\text{Cu}^{2+}$  at 550 nm.

## References:

1. V. S. Jisha, A. J. Thomas and D. Ramaiah, *J. Org. Chem.*, 2009, **74**, 6667-6673.
2. J.-T. Yeh, W.-C. Chen, S.-R. Liu and S.-P. Wu, *New J. Chem.*, 2014, **38**, 4434-4439.
3. Y. Fu, Q.-C. Feng, X.-J. Jiang, H. Xu, M. Li and S.-Q. Zang, *Dalton Trans.*, 2014, **43**, 5815-5822.
